# Supplementary material for: Preparation of porous CuO films from Cu(NO3)2 aqueous solutions containing poly(vinylpyrrolidone) and their photocathodic properties
Source: Royal Society of Chemistry journal article supplement (doi:10.1039/c6ra26590a), 2017-01-01
Supplement: c6ra26590a1.pdf [file c6ra26590a1.pdf]

# Preparation of porous CuO films from $\text{Cu}(\text{NO}_3)_2$ aqueous solutions containing poly(vinylpyrrolidone) and their photocathodic properties

Hiroaki Uchiyama, Kouta Isobe and Hiromitsu Kozuka

E-mail address: [h\\_uchi@kansai-u.ac.jp](mailto:h_uchi@kansai-u.ac.jp) (H. Uchiyama).

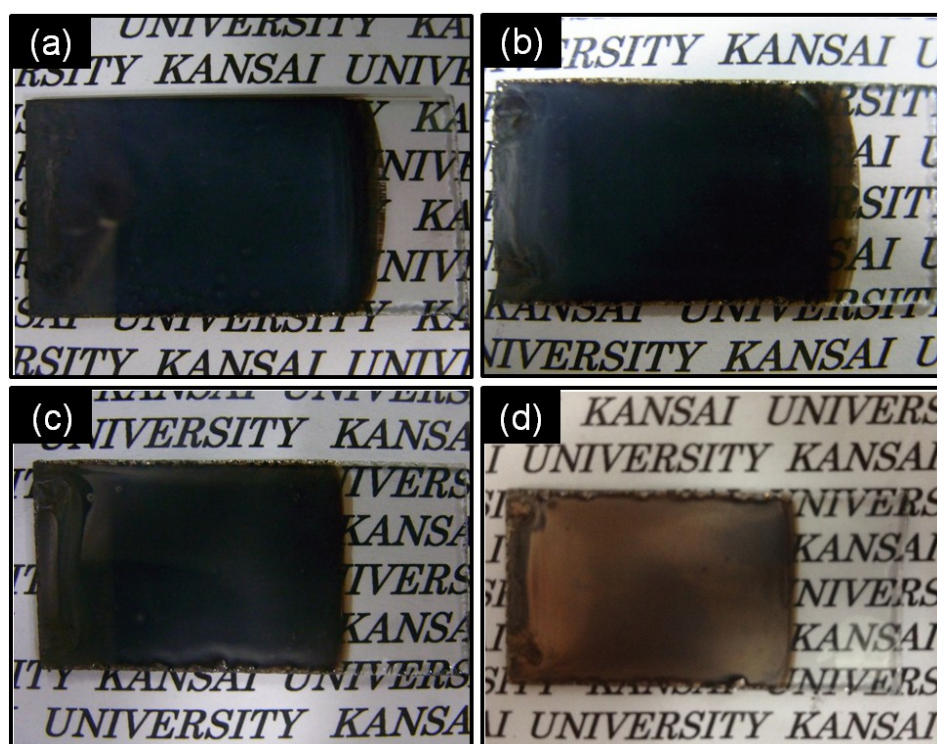

**Fig. S1** Optical micrographs of the CuO films prepared at [PVP] = 0.05 M with 10-times coating (a), [PVP] = 0.10 M with 5-times coating (b), [PVP] = 0.25 M with 3-times coating (c) and [PVP] = 0.40 M with 2-times coating (d).

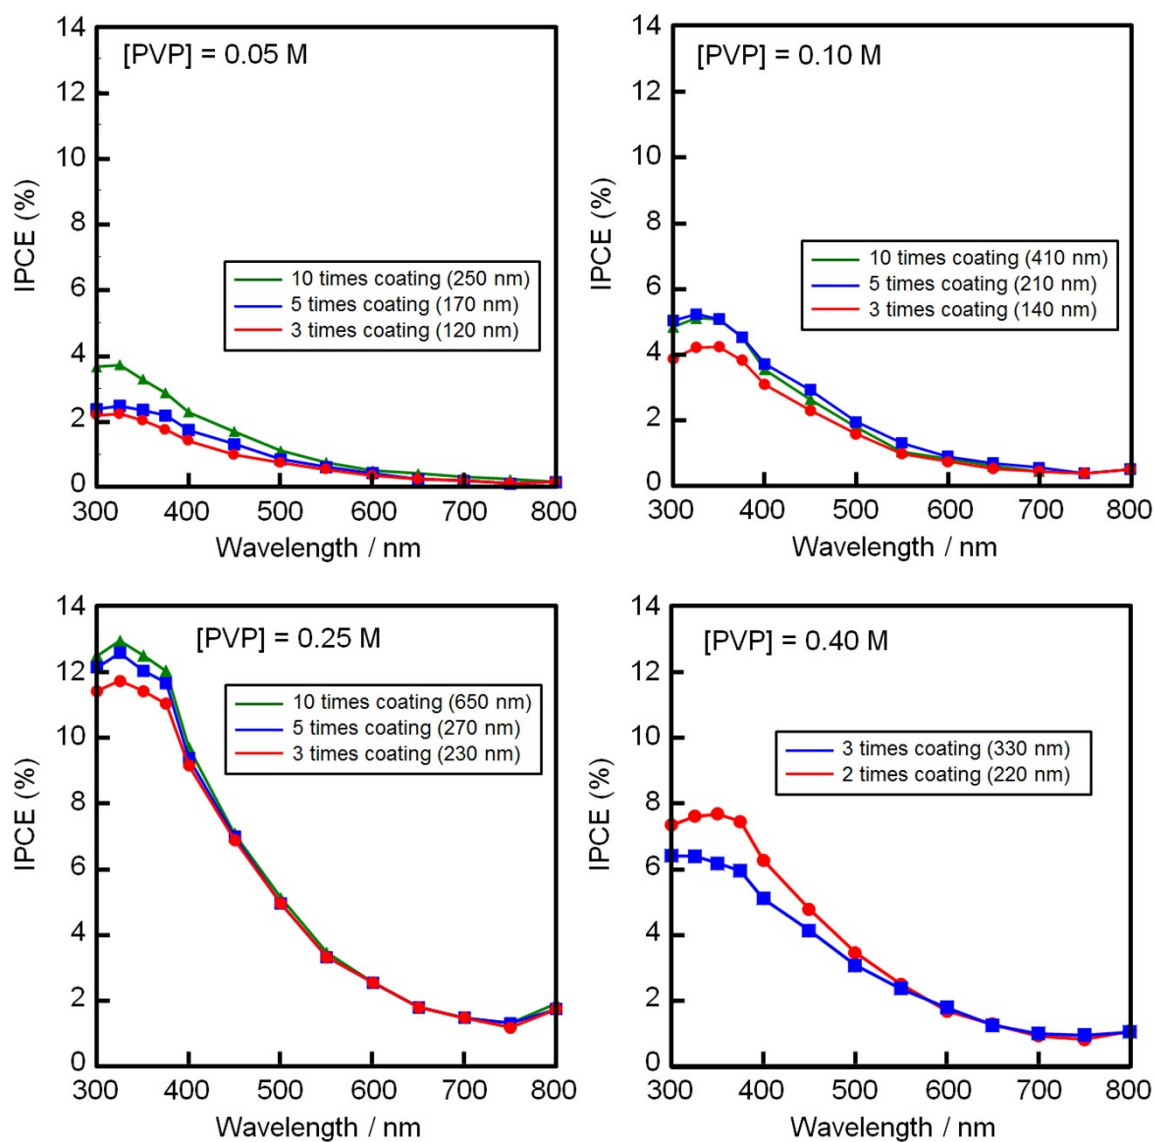

**Fig. S2** Action spectra of the CuO films prepared at [PVP] = 0.05 M with 3–10 times coating, [PVP] = 0.10 M with 3–10 times coating, [PVP] = 0.25 M with 3–10 times coating and [PVP] = 0.40 M with 2–3 times coating.

**Table S1** Carbon (C) content in Films PVP0.05–0.40

| Film    | C content / atom% |
|---------|-------------------|
| PVP0.05 | 2.2               |
| PVP0.10 | 2.3               |
| PVP0.25 | 2.0               |
| PVP0.40 | 0                 |

\*In order to remove the dust on the surface of CuO films, the surface etching was done by using Ar<sup>+</sup> ion sputtering before the analysis of chemical compositions.

**Table S2** Negative photocurrent of Films PVP0.05–0.40 under the irradiation of white light irradiation\*

| Film    | Photocurrent / $\mu\text{A cm}^{-2}$ |                          | Photocurrent decrease rate / % |
|---------|--------------------------------------|--------------------------|--------------------------------|
|         | 1 s light irradiation                | 30 min light irradiation |                                |
| PVP0.05 | -134                                 | -27.4                    | 79.1                           |
| PVP0.10 | -144                                 | -29.1                    | 79.8                           |
| PVP0.25 | -246                                 | -34.5                    | 86.0                           |
| PVP0.40 | -209                                 | -34.9                    | 83.3                           |

\* The current-potential curves of Films PVP0.05–0.40 were measured for 30 min at a working electrode potential of -0.1 V vs SCE under the white light.
